1  
2  
3  
4  
5  
6  
7  
8  
9  
10  
11  
12  
13  
14  
15  
16  
17  
18  
19

**NNAL, a major metabolite of tobacco-specific carcinogen NNK, promotes lung cancer progression through deactivating LKB1 in an isomer-dependent manner**

Tengfei Bian<sup>1#</sup>, Yuzhi Wang<sup>1#</sup>, Jordy F. Botello<sup>1</sup>, Qi Hu<sup>1</sup>, Yunhan Jiang<sup>2</sup>, Adriana Zingone<sup>3</sup>, Pedro A. Corral<sup>1</sup>, F. Zahra Aly<sup>4</sup>, Yougen Wu<sup>1,5</sup>, Bríd M. Ryan<sup>3</sup>, Lingtao Jin<sup>2</sup>, Chengguo Xing<sup>1\*</sup>

<sup>1</sup> Department of Medicinal Chemistry, University of Florida, 1345 Center Drive, Gainesville, FL 32610, USA

<sup>2</sup> Department of Anatomy and Cell biology, University of Florida, Gainesville, FL 32610, USA

<sup>3</sup> Laboratory of Human Carcinogenesis, Center for Cancer Research, National Cancer Institute, National Institutes of Health, Bethesda, MD 20892, USA

<sup>4</sup> Department of Pathology, Immunology and Laboratory Medicine, University of Florida, 1345 Center Drive, Gainesville, FL 32610, USA

<sup>5</sup> College of Tropical Agriculture and Forestry, Hainan University, 58 Renmin Avenue, Haikou 570228, China

\* Corresponding author: Tel: 352-294-8511. Email: [chengguoxing@cop.ufl.edu](mailto:chengguoxing@cop.ufl.edu)

# These two authors contributed equally to this paper.

20 **Abstract**

21 Smoking is associated with worse clinical outcomes for lung cancer patients. Cell-based studies  
22 suggest that NNK (a tobacco specific carcinogen) promotes lung cancer progression. Given its  
23 short half-life, the physiological relevance of these *in vitro* results remains elusive. NNAL, a major  
24 metabolite of NNK with a similar structure, a chiral center, and a longer half-life, has never been  
25 evaluated in cancer cells. In this study, we characterized the effect of NNAL and its enantiomers  
26 on cancer progression among a panel of NSCLC cell lines and explored the associated  
27 mechanisms. We found that (R)-NNAL promotes cell proliferation, enhances migration, and  
28 induces drug resistance while (S)-NNAL has much weaker effects. Mechanistically, (R)-NNAL  
29 phosphorylates and deactivates LKB1 via the  $\beta$ -AR signaling in the LKB1 wild type NSCLC cell  
30 lines, contributing to the enhanced proliferation, migration, and drug resistance. Of note, NNK  
31 exposure also increases the phosphorylation of LKB1 in A/J mice. More importantly, human lung  
32 cancer tissues appear to have elevated LKB1 phosphorylation. Our results reveal, for the first time,  
33 that NNAL may promote lung cancer progression through LKB1 deactivation in an isomer-  
34 dependent manner.

## 35 1. Introduction

36 Lung cancer has been the leading cause of cancer-related deaths for decades [1-3]. It accounts  
37 for one in every five cancer deaths worldwide with about 160,000 deaths annually in the United  
38 States. While there are several other factors that may increase lung cancer risk, tobacco smoke is  
39 the main etiological factor associated with lung cancer development [4]. It is also associated with  
40 worse clinical outcome, including reduced therapeutic efficacy and shorter survival [5, 6]. For  
41 instance, the median survival for non-smokers, former smokers, and active smokers among  
42 patients with non-small cell lung cancer (NSCLC) is 41.9, 22.6, and 14.7 months respectively [7].  
43 However, 30 – 65% of NSCLC patients were active smokers at diagnosis and a significant portion  
44 of them continued to smoke (Table 1) [7-13]. It is therefore imperative to understand how tobacco  
45 use contributes to the worse clinical outcomes of lung cancer patients.

46 4-(Methylnitrosamino)-1-(3-pyridyl)-1-butanone (commonly known as “NNK”, Fig. 1A) is a  
47 tobacco specific lung carcinogen [14]. As a carcinogen, NNK is bioactivated by cytochrome P450  
48 enzymes to induce DNA damage followed by subsequent mutations and carcinogenesis [15, 16].  
49 NNK also promotes cell proliferation, enhances cell migration, and suppresses apoptosis in various  
50 cancer cell lines [17, 18]. Nicotinic acetylcholine receptors (nAChRs) [19] and  $\beta$ -adrenergic  
51 receptors ( $\beta$ -ARs) [20] have been suggested as the potential upstream targets of NNK. One key  
52 uncertainty of these *in vitro* results is their physiological relevance since NNK has a short-half life  
53 *in vivo* [21-24]. Indeed, NNK has never been detected in human biospecimens. Because of this,  
54 the metabolites of NNK have been used to investigate its human exposure and carcinogenic risk  
55 [25-28].

56 The major metabolite of NNK is 4-(methylnitrosamino)-1-(3-pyridyl)-1-butanol (commonly  
57 known as “NNAL”, Fig. 1A), which is formed via carbonyl reduction [29, 30]. Although  
58 structurally similar, NNAL has two key differences from NNK. First, NNAL has a much longer  
59 half-life *in vivo* relative to NNK [24]. In fact, NNAL is detectable in human urine samples weeks  
60 after the last tobacco exposure [31-33]. NNAL is also readily detected in blood samples from  
61 smokers [25]. For instance, Church *et al.* profiled serum levels of NNAL among 200 smokers  
62 selected from the Prostate, Lung, Colorectal, and Ovarian Cancer Screening Trial (PLCO). One  
63 hundred of these participants eventually developed lung cancer while the rest did not. Although  
64 the participants in these two groups were not rigorously matched in terms of age, gender and  
65 smoking history, NNAL concentrations were  $92.4 \pm 40.7$  pM in the lung cancer cases and  $77.4 \pm$   
66  $39.3$  pM in the control groups. Second, NNAL has a chiral center (Fig. 1A). Its formation from  
67 NNK is catalyzed by a range of carbonyl reductases [26] and its elimination is mainly mediated  
68 through glucuronidation via UDP-glucuronosyltransferases (UGT) [27, 34]. Because of germline  
69 genetic variance in these metabolizing enzymes, smokers have a heterogeneous ratio of (R)-NNAL  
70 and (S)-NNAL [35]. These two enantiomers could have distinct biological activities. For instance,  
71 (S)-NNAL is much more carcinogenic than (R)-NNAL in A/J mice [34]. With the same dose  
72 treatment, (S)-NNAL resulted in much higher levels of DNA damage in the lung tissues and  
73 subsequently more lung adenoma formation than (R)-NNAL while (R)-NNAL was more  
74 efficiently eliminated via glucuronidation. These data argue that NNAL enantiomers may induce  
75 different biological effects and should be characterized as distinct individual entities. To date, the  
76 effect of NNAL on transformed lung cancer cells has not been reported. Such knowledge is

77 important to help understand the reason for the worse outcome of lung cancer patients who  
78 continue to smoke.

79 In this study, we evaluated the effect of NNAL enantiomers on five human NSCLC cell lines  
80 at physiologically relevant concentrations. (R)-NNAL promoted cell proliferation, enhanced cell  
81 migration, and induced drug resistance while (S)-NNAL was substantially less effective. The  
82 effects of NNAL on cell migration and drug resistance required wild type liver kinase B1 (LKB1).  
83 Mechanistically, NNAL exposure, particularly the R enantiomer, led to LKB1 phosphorylation  
84 and deactivation through activating  $\beta$ -ARs. LKB1 phosphorylation was also observed in the lung  
85 tissues of A/J mice upon NNK exposure. Human lung cancer tissues had substantially higher levels  
86 of phosphorylated LKB1 relative to the paired normal lung tissues. In summary, NNAL,  
87 particularly (R)-NNAL, deactivates LKB1 through  $\beta$ -ARs in NSCLC cancer cell lines. Such LKB1  
88 deactivation confers drug resistance and promotes invasion. In addition, LKB1 loss-of-function  
89 human lung cancers may be highly prevalent via phosphorylation due to common tobacco  
90 exposure in addition to the mutational deactivation. Overall, our results depict a novel mechanism  
91 through which active smoking may contribute to the worse outcome of lung cancer patients.

92

## 93 **2. Results**

### 94 **2.1. Detection and quantification of NNK and NNAL in human blood samples from smokers** 95 **and non-smokers**

96 To determine the physiologically relevant compound(s) and concentrations for our studies, we  
97 quantified NNK and NNAL in the plasma from smokers (n = 46) and non-smokers (n = 3) via an

98 established liquid chromatography with tandem mass spectrometry (LC-MS/MS) method [36].  
99 The smoking status of the plasma donors was confirmed by measuring their urinary total nicotine  
100 equivalents (TNE). Some of the results have been published [37, 38]. Consistent with its short  
101 half-life, NNK was not detected in any of these samples (Fig. 1B). NNAL was not detectable in  
102 the plasma samples from non-smokers (not shown) while it was readily detected in the plasma  
103 samples from smokers (Fig. 1B). The plasma concentration of NNAL ranged between 10.4 pM to  
104 296.0 pM with a mean value of  $59.7 \pm 61.1$  pM. NNAL was therefore evaluated in our *in vitro*  
105 study instead of NNK.

106

## 107 **2.2. The effects of NNAL enantiomers on cell proliferation, migration and drug resistance in** 108 **NSCLC cancer cells with different LKB1 status**

109 The concentrations of NNAL detected in the plasma samples from smokers were in the  
110 picomolar range, consistent with those reported in the literature [25, 39, 40]. NNAL concentrations  
111 in the lung are expected to be much higher because of the direct exposure of lung to tobacco smoke.  
112 We proposed that NNAL concentrations between 1-100 nM are physiologically relevant, and this  
113 range was therefore used in our subsequent *in vitro* studies.

114 NNAL exposure in H1299 and A549 cells resulted in no detectable  $O^6$ -mG (data not shown),  
115 suggesting the lack of NNAL bioactivation and associated carcinogenesis. However, NNAL at 10  
116 nM significantly increased cell proliferation (Fig. 2A). When the two enantiomers of NNAL were  
117 evaluated, (R)-NNAL recapitulated this activity in both cell lines while (S)-NNAL had minimal  
118 effects (Fig. 2B). Similarly, (R)-NNAL significantly increased colony formation in H1299 and

119 A549 cells while (S)-NNAL was not effective (Fig. 2C). The potential of NNAL enantiomers on  
120 cell migration was evaluated via wound healing assay (Fig. 2D) and trans-well assays (Fig. 2E) in  
121 H1299 and A549 cells. In both assays, (R)-NNAL substantially increased cell migration while (S)-  
122 NNAL had little effects in H1299 cells. Intriguingly, NNAL treatment had no effects in A549 cells  
123 (Fig. 2D and 2E). Lastly, the effect of NNAL on the cytotoxicity of gemcitabine and cisplatin was  
124 evaluated via a cell viability assay. (R)-NNAL significantly reduced the cytotoxicity of  
125 gemcitabine and cisplatin. (S)-NNAL conferred less resistance compared with (R)-NNAL (Fig.  
126 2F). Both NNAL enantiomers failed to induce resistance in A549 cells (Fig. 2F).

127 Although there are many molecular and genetic differences between H1299 and A549 cell  
128 lines that could account for the observed differences in cellular migration and drug resistance, we  
129 focused on LKB1 because of its importance in lung cancer development [41-48] and its different  
130 status in H1299 (wild-type) and A459 (mutational deactivation). Moreover, LKB1 is a potential  
131 down-stream target for  $\beta$ -ARs, which NNK has been reported to activate [19, 20]. We therefore  
132 evaluated the effect of (R)-NNAL in HCC827 (*LKB1* WT), H1975 (*LKB1* WT) and H460 (*LKB1*  
133 mutant) cells. As have been observed in H1299 and A549, (R)-NNAL enhanced cell proliferation  
134 in all of these cell lines (Fig. S1). While (R)-NNAL reduced the sensitivity of HCC827 and H1975  
135 cells to cisplatin and gemcitabine, it failed to reduce the sensitivity of H460 to these therapies (Fig.  
136 S2). Together, these data suggest that the status of *LKB1* in NSCLC cancer cell lines may be critical  
137 to the detrimental effects of NNAL, particularly in cell migration and drug resistance.

138

139 **2.3. The role of LKB1 on NNAL-mediated cell migration and drug resistance in NSCLC cells**

140 To characterize the role of LKB1 in mediating the cellular effects of NNAL, an *LKB1*-  
141 knockout H1299 cell line was generated using a CRISPR knockout approach (LKB1-KO H1299,  
142 Fig. 3A). As expected, (R)-NNAL failed to facilitate cell migration in LKB1-KO H1299 cells (Fig.  
143 3B) and did not induce resistance to gemcitabine nor cisplatin (Fig. 3C). Similarly, WT LKB1 was  
144 knocked into A549 cells (Fig. 3D). (R)-NNAL was able to promote cell migration (Fig. 3E) and  
145 confer drug resistance in A549 cells with LKB1 knock-in (Fig. 3F). Altogether, these data suggest  
146 that LKB1 plays a key role in NNAL-mediated migration and drug resistance in *LKB1* WT lung  
147 cancer cells and the loss of LKB1 significantly reduced the impact of (R)-NNAL exposure.

148

#### 149 **2.4. The effect of NNAL enantiomers on LKB1 phosphorylation in lung cancer cells**

150 We next characterized the effect of NNAL enantiomers on LKB1 phosphorylation in H1299,  
151 H1975, and HCC827 cells. Increased deactivating phosphorylation of LKB1 at Ser428 was  
152 observed in all of these cells with greater increase upon the (R)-NNAL exposure than the (S)-  
153 enantiomer (Fig. 4A). The time course of LKB1 phosphorylation by (R)-NNAL was characterized  
154 in H1299 cells (Fig. 4B). (R)-NNAL treatment also led to a significant reduction in phosphorylated  
155 AMPK, and increase in phosphorylated mTOR and 4E-B1 (Fig. 4C). Since AMPK, mTOR and  
156 4EB-P1 are downstream proteins of LKB1, the reduction in AMPK phosphorylation and increase  
157 in mTOR and 4E-BP1 phosphorylation suggest the deactivation of LKB1, consistent with its  
158 increased phosphorylation. (R)-NNAL treatment also reduced cleaved PARP caused by cisplatin  
159 treatment, had little effect on cisplatin-induced DNA damage, and may slightly reduce the level of  
160 Bim protein (Fig. 4D and Fig. 4E), which may explain the reduced sensitivity of H1299 cells to



161 cisplatin treatment in the presence of (R)-NNAL. In addition, (R)-NNAL treatment resulted in a  
162 slight increase in the level of PCNA (Fig. 4F), potentially accounting for its stimulation of cell  
163 proliferation.

164

## 165 **2.5. The upstream signaling responsible for NNAL-mediated LKB1 phosphorylation**

166 Upon establishing the role of LKB1, we explored the potential upstream targets of NNAL  
167 responsible for LKB1 phosphorylation and associated phenotypes. NNK has been reported to act  
168 as an agonist for nAChRs [19] and  $\beta$ -ARs [20]. This could result in the activation of protein kinase  
169 A (PKA) via intracellular calcium influx and cAMP synthesis, which would phosphorylate and  
170 deactivate LKB1 [49]. First, we found (R)-NNAL could promote PKA-C $\alpha$  nucleus translocation  
171 in H1299 (Fig. 5A). And then, we utilized a panel of pharmacological inhibitors to probe the  
172 relevance of these potential upstream signaling processes, including propranolol (a  $\beta$ -AR  
173 antagonist), nifedipine (a calcium channel blocker), H89 (a PKA inhibitor) and yohimbine (an  $\alpha$ 2-  
174 AR antagonist as a control). We evaluated their effects on NNAL-induced proliferation in H1299  
175 cells (Fig. 5B). At non-cytotoxic concentrations, each pharmacological inhibitor, except  
176 yohimbine, effectively blocked (R)-NNAL-induced enhanced proliferation. Similarly, these  
177 pharmacological inhibitors, with the exception of yohimbine, effectively blocked (R)-NNAL  
178 induced resistance against gemcitabine or cisplatin in H1299 cells (Fig. 5C). Consistently, each  
179 pharmacological inhibitor, with the exception of yohimbine, reduced the phosphorylation of LKB1  
180 (Ser428) induced by (R)-NNAL exposure (Fig. 5B). Overall, these data delineate the signaling  
181 process of LKB1 deactivation by NNAL.

182

## 183 **2.6. The effect of prolonged (R)-NNAL exposure on H1299 cells**

184 The lung tissue of smokers may be chronically exposed to NNAL due to the habitual use of  
185 tobacco and the slow elimination of NNAL. We therefore evaluated the effect of long-term (R)-  
186 NNAL exposure on H1299 cells. Specifically, H1299 cells were cultured with (R)-NNAL (1 nM)  
187 for 60 days. Then, in the absence of NNAL, the phosphorylation status of LKB1 was characterized  
188 and cell proliferation, colony formation, cell migration and the sensitivity of such cells to  
189 gemcitabine and cisplatin treatment was evaluated. Long-term NNAL exposure resulted in a  
190 substantial increase in LKB1 (Ser428) phosphorylation even in the absence of NNAL (Fig. 6A).  
191 These H1299 cells proliferated faster, supported by the cell proliferation data (Fig. 6B) and colony  
192 formation data (Fig. 6C). And these H1299 cells were also significantly less sensitive to cisplatin  
193 and gemcitabine treatment in the absence of NNAL (Fig. 6D). These data suggest that the effect  
194 of long-term NNAL exposure on LKB1 deactivation and drug resistance could be long-lasting.  
195 Interestingly, the addition of NNAL to such cells failed to further enhance drug resistance (data  
196 not shown). Mechanically 60 days exposure to 1 nM (R)-NNAL has little effect on cisplatin  
197 induced DNA damage indicated by the level of  $\gamma$ H2A.X, and significantly reduced PARP cleavage  
198 (Fig. 6E.). In addition, H1299 cell migration was also enhanced upon 60 days exposure to (R)-  
199 NNAL (Fig. 6F. and Fig. 6G).

200

## 201 **2.7. The effect of NNK exposure in A/J mice on LKB1 phosphorylation**

202 To explore whether NNK induces LKB1 phosphorylation *in vivo*, a pilot study in A/J mice was  
203 performed. In this study, NNK was administered in drinking water at a concentration of 40 ppm.  
204 This treatment regimen mimics the chronic exposure of NNK among smokers although liver  
205 instead of lung is the tissue of main exposure. The dose of NNK (40 ppm) in mice is comparable  
206 to the level of NNK exposure among heavy smokers [50]. A similar treatment regimen has been  
207 demonstrated to induce lung adenoma formation in A/J mice [51-53]. The lung and liver tissues  
208 were collected after a 4-week NNK exposure. Again, NNK was not detectable in any serum  
209 samples while NNAL was detected all (Fig. 6H), consistent with human data. The serum  
210 concentration of NNAL in the mice ranged between 0.83 – 3.55 nM, similar to the concentration  
211 used in our *in vitro* studies. NNK treatment substantially increased LKB1 phosphorylation in the  
212 liver tissues with a slight increase in the lung tissues (Fig. 6H), indicating the deactivation of LKB1  
213 in A/J mice upon NNK exposure. The higher levels of LKB1 phosphorylation in the liver tissues  
214 than the lung tissues in this model may be caused by the NNK drinking water regimen that the  
215 liver tissues have higher exposure to NNK than the lung tissues. In human smokers, the lung tissues  
216 have higher exposure to NNK that may favor LKB1 phosphorylation in the lung tissues.

217

## 218 **2.8. LKB1 status in lung cancer tissues**

219 To explore the potential clinical significance of LKB1 phosphorylation by NNAL, we  
220 characterized the phosphorylation status of LKB1 protein in five lung cancer tissues in comparison  
221 to the normal tissues from the same patients (Fig. 6I). Although there are variations and no obvious  
222 patterns in the total protein levels of LKB1 between the normal and cancer tissues, p-LKB1

223 (Ser428) were substantially higher in the cancer tissues relative to the normal tissues irrespective  
224 of the lung cancer pathology.

225

### 226 3. Discussion

227 Clinical management of lung cancer has not been very successful and the overall survival from  
228 lung cancer remains frustratingly low [1-3]. There are many contributing factors, including late  
229 diagnosis and higher risk of drug resistance and metastasis [54-56]. At the same time, many lung  
230 cancer patients are active smokers at the time of diagnosis and a significant portion of them  
231 continue to smoke, which is associated with worse outcomes [5, 6]. NNK has been proposed as a  
232 contributing factor because it could enhance lung cancer proliferation and survival, and promote  
233 metastasis *in vitro* and *in vivo* [17, 18, 57, 58]. Potential mechanisms have been characterized *in*  
234 *vitro*, including the activation of CREB, ERK1/2, and Akt with nAChRs and  $\beta$ -ARs as the  
235 upstream targets [19, 20, 58, 59]. These mechanistic studies, however, may have limited  
236 physiological relevance because NNK is not detectable in human plasma samples. Its major  
237 metabolite, NNAL, on the other hand, is detected in the plasma samples from all smokers in our  
238 study with a concentration approaching 300 pM. Given that lung tissue has the highest exposure  
239 to tobacco smoke, NNAL between 1 and 100 nM *in vitro* is likely physiologically relevant. Within  
240 this concentration range, NNAL enhanced cell proliferation in all five NSCLC cancer cell lines  
241 tested, with (R)-NNAL being more potent than (S)-NNAL. NNAL also promoted cell migration  
242 and induced drug resistance in NSCLC cell lines that have wild-type LKB1. Such effects were  
243 also more pronounced with (R)-NNAL than (S)-NNAL. These results suggest that the detrimental

244 effects of NNAL may vary among smokers because of genetic polymorphisms in NNAL  
245 metabolizing enzymes, such as carbonyl reductases and UGTs. It should also be noted that  
246 although the stimulating effects by NNAL on proliferation, migration and resistance are not very  
247 strong under our experimental conditions, the cumulative impact should not be underestimated  
248 given the chronic exposure of the lungs to NNAL among smokers. Indeed, a 60-day exposure of  
249 H1299 cells to (R)-NNAL (1 nM) resulted in significant enhancing of cell proliferation, migration  
250 and drug resistance in combination with LKB1 phosphorylation even in the absence of NNAL.

251 LKB1 mutational deactivation has been observed in 10 – 30% of lung cancer patients of  
252 different pathological subtypes [41-44]. Results from a number of genetic mouse models strongly  
253 indicate that LKB1 inactivation plays an important role in lung cancer initiation, development, and  
254 progression [46-48, 60]. Indeed, lower levels of LKB1 expression has been reported to be  
255 associated with higher recurrence in NSCLC [61] and loss of LKB1 has been discussed beyond  
256 just mutations [62]. Upon analyzing a limited number of lung cancer tissues, we observed  
257 enhanced LKB1 phosphorylation in lung cancer tissues compared with paired normal lung tissues.  
258 These data suggest that the function of wild-type LKB1 protein in lung cancers may be  
259 compromised and the potential contribution of LKB1 deactivation to human lung cancer could be  
260 substantially higher than its mutational frequency, something that warrants future investigation. It  
261 is therefore of great importance to understand how wild-type LKB1 is phosphorylated in lung  
262 cancer patients. Our results showed for the first time that NNAL, particularly (R)-NNAL, induces  
263 LKB1 phosphorylation (Ser428) in NSCLC cancer cells. Since a 60-day NNAL exposure resulted  
264 in phosphorylated LKB1 even upon NNAL removal, prior or active tobacco use among former  
265 and current smokers, respectively, could contribute to the phosphorylation and deactivation of

266 LKB1 in human lung cancer tissues. This was further supported by our A/J mouse data that a 4-  
267 week NNK exposure resulted in LKB1 phosphorylation in the lung tissues. Based on our results  
268 with pharmacological inhibitors,  $\beta$ -ARs are the potential up-stream target(s) for NNAL that then  
269 activate PKA, leading to LKB1 phosphorylation (Fig. 7). Other agonists for  $\beta$ -ARs, such as mental  
270 stress-related stress hormones norepinephrine and epinephrine, may also deactivate LKB1 in  
271 humans, which again warrants future investigation. Indeed, nicotine exposure and mental stress  
272 have also been documented as potential factors contributing to the worse outcome of lung cancer  
273 patients [63, 64].

274

275 Of note, (R)-NNAL stimulated cell proliferation in all NSCLC cancer cells irrespective of  
276 LKB1 status, suggesting that NNAL modulates signaling mechanisms independent of LKB1.  
277 NNK has been reported to activate CREB, a master oncoprotein [57, 65, 66], to promote  
278 progression in established tumors. CREB activation is dominantly mediated via PKA as well. We  
279 therefore evaluated the effect of NNAL on CREB phosphorylation in all five NSCLC cells. NNAL  
280 rapidly activated CREB in these cell lines independent of LKB1 status with (R)-NNAL being more  
281 potent than (S)-NNAL (Fig. S3). Thus, increased CREB phosphorylation and activation may  
282 contribute to the increased proliferation of NSCLC cancer cells induced by NNAL.

283 In summary, our results show that NNAL can deactivate LKB1 in lung cancer cells at  
284 physiologically relevant concentrations in an isomeric dependent manner. Such deactivation may  
285 be of great clinical relevance given the tumor suppressive functions of LKB1 in lung cancer  
286 initiation, development and progression and the high prevalence of tobacco exposure among lung

287 cancer patients. Further *in vivo* and clinical studies are warranted to validate NNAL's tumor  
288 promoting effects, its contribution to LKB1 deactivation and the worse clinical outcome of lung  
289 cancer patients who continue to smoke.

290

## 291 **4. Materials and Methods**

292 **Caution:** Both NNK and NNAL are highly carcinogenic. They should be handled in a well-  
293 ventilated hood with extreme care, and with proper personal protective equipment.

294

### 295 **4.1. Chemicals and Reagents**

296 NNK, [<sup>13</sup>C<sub>6</sub>]NNK, [<sup>13</sup>C<sub>6</sub>]NNAL, [CD<sub>3</sub>]O<sup>6</sup>-mG were purchased from Toronto Research  
297 Chemicals (Toronto, Ontario, Canada). (±)-Propranolol hydrochloride, bupropion and H89 were  
298 purchased from Sigma-Aldrich (St. Louis, MO, USA). Nifedipine was purchased from Alfa Aesar  
299 (Ward Hill, MA, USA). Yohimbine hydrochloride was purchased from Acros Organics (Morris,  
300 NJ, USA). All reagents were used without further purification.

301

### 302 **4.2. Human samples**

303 Plasma samples from active smokers were collected from a clinical trial previously conducted  
304 at the University of Minnesota [36] and from active smoking population controls in the NCI-MD  
305 Lung cancer Case Control Study [67]. Plasma samples from non-smokers were purchased from  
306 Bioreclamation IVT (Baltimore, MD). Demographic information of these donors has been

307 published before [37, 68]. Paired normal and cancerous lung tissues from five patients were  
308 acquired from University of Florida CTSI Biorepository. The protocols for human sample use were  
309 reviewed and approved by Institutional Review Boards (IRB) at the University of Florida.

310

### 311 **4.3. NNAL synthesis, chiral resolution, and characterization**

312 Racemic NNAL was synthesized from NNK via sodium borohydride reduction. (R)- and (S)-  
313 NNAL were separated from the racemic mixture via chiral chromatography by a contract service  
314 from Kermanda Biotech Co Ltd. (Shanghai, China). Racemic, (R)- and (S)-NNAL were  
315 characterized by <sup>1</sup>H-NMR and HPLC with > 95% purity. The chirality of the two enantiomers,  
316 (R)- and (S)-NNAL, was assigned on the basis of reported optical rotations of NNAL [69].

317

### 318 **4.4. NNK and NNAL quantification in human plasma samples and mouse serum samples**

319 The concentrations of NNK and NNAL in human plasma and mouse serum samples were  
320 quantified following a previously reported mass spectrometry method [70].

321

### 322 **4.5. Cell lines and culturing conditions**

323 H1299, H1975, HCC827, H460 and A549 cells were purchased from ATCC (Manassas, VA).  
324 H1299, A549 and H460 were authenticated via the Cell Line Authentication Service provided by  
325 Genetica DNA Laboratories (Burlington, NC). H1975 and HCC827 were authenticated by ATCC.  
326 All of these cell lines were confirmed to be free from mycoplasma infection. H1299, H1975,



327 HCC827 and H460 cells were maintained in RPMI 1640 medium supplemented with 10% FBS  
328 (Gibco). A549 cells were maintained in DMEM medium supplemented with 10% FBS. All cells  
329 were cultured in a 37 °C, 5% CO<sub>2</sub> atmosphere. H1299 LKB1 knockout was reported before [71].  
330 For A549 LKB1 knock-in, STK11(LKB1) gene was subcloned into PLX-304 vector. Lentivirus  
331 production was performed using psPAX2 (Addgene#12260) and pMD2.G (Addgene#12259) as  
332 previously described [72]. Single clones of cells expressing LKB1 were selected using blasticidin  
333 (5ug/ml) and LKB1 expression was confirmed by western blot.

334

#### 335 **4.6. Analysis of *O*<sup>6</sup>-methylguanine (*O*<sup>6</sup>-mG) in H1299 cells upon NNAL treatment**

336 Among the various forms of DNA damages caused by NNK and NNAL, *O*<sup>6</sup>-mG was the most  
337 abundant in A/J mouse lung tissues [73] and of comparable abundance to other types of DNA  
338 damage in F344 rat lungs [74] although such DNA damage has not been detected in human lung  
339 tissues. We therefore quantified *O*<sup>6</sup>-mG in H1299 cells upon NNAL exposure (100 nM) using an  
340 established mass spectrometry method [75].

341

#### 342 **4.7. Cell counting assay**

343 Cell proliferation was determined using a cell count assay. Briefly, 5,000 cells/well were  
344 seeded in a 24-well plate with 10% FBS medium. After overnight incubation, medium was  
345 replaced with 0.5% FBS medium containing NNAL. After a 6-day incubation, cells were  
346 trypsinized and cell numbers were determined using the Bio-Rad Automated Cell Counter.

347

#### 348 **4.8. Colony formation assay**

349 Cell proliferation was also determined using colony formation assay. Briefly, cells were plated  
350 in a 24-well plate (500 cells/well) in 0.5% FBS medium with or without NNAL. The number of  
351 colonies was counted after a 7-day incubation under the microscope.

352

#### 353 **4.9. Wound healing assay**

354 Cell migration was measured using the wound healing assay. Briefly, cells were seeded into a  
355 six-well plate and allowed to grow to ~90% confluency. After starvation with FBS-free medium  
356 for 48 h, cell monolayers were wounded with a 200- $\mu$ L pipette tip. Wounded monolayers were  
357 washed three times with PBS and incubated in serum-free medium with different concentrations  
358 of NNAL for 24 h. Cells were monitored under a microscope equipped with a camera. The wound  
359 area was quantified using Image J software.

360

#### 361 **4.10. Transwell assay**

362 Cell migration was also evaluated with the transwell migration assay using 6.5 mm diameter  
363 inserts (Corning) with 8  $\mu$ m pore size. The inserts were plated in a 24-well plate with 600  $\mu$ L 10%  
364 FBS medium. Briefly, 30,000 cells in 200  $\mu$ L serum free medium with 100 nM (R)- or (S)-NNAL  
365 were seeded into each insert. After incubation at 37 °C for 24 h, the cells in the upper surface of  
366 the membrane were removed with a cotton swab. Cells in the lower chamber were fixed with 70%

367 ethanol and stained with 0.2% crystal violet (Sigma-Aldrich in St. Lewis, MO, USA). Images were  
368 taken with an inverted microscope and the number of cells was quantified using ImageJ.

369

#### 370 **4.11. Cell viability assay**

371 Drug resistance was evaluated via a cell viability assay. Briefly cells were plated in 96-well  
372 plates (5,000 cells/well) with 10% FBS medium. After attachment, cells were treated with the test  
373 compounds at the specified concentrations or combinations in triplicate with 0.5% FBS medium.  
374 The relative cell viability in each well was determined after 72 h treatment using the MTT assay  
375 (Life Technologies).

376

#### 377 **4.12. NNK exposure in A/J mice**

378 Female A/J mice (5-6 weeks of age) were purchased from the Jackson Laboratory (Bar Harbor,  
379 ME) and maintained in specific pathogen-free facilities, according to animal welfare protocols  
380 approved by Institutional Animal Care and Use Committee at the University of Florida. After 1-  
381 week acclimation, mice were weighed, randomized into two groups (n = 5) and switched to AIN-  
382 93G powdered diet, defined as Day 1. From Day 1, mice in the control group were given regular  
383 drinking water while the NNK group was given NNK in drinking water (40 ppm). Mice were  
384 euthanized 4 weeks after NNK exposure. The lung and liver tissues were harvested, snap-frozen  
385 in liquid N<sub>2</sub> and stored at -80 °C until protein analysis. Serum was collected for NNK and NNAL  
386 detection.

387

#### 388 **4.13. Western blotting**

389 Whole cell lysates from H1299, H1975, HCC827, A549 and H460 cells were prepared in RIPA  
390 lysis buffer. Protein lysates from human and mouse lung tissues were prepared similarly. Briefly,  
391 20 mg tumor or normal tissue was homogenized in 250  $\mu$ L RIPA buffer and the supernatant was  
392 collected after centrifugation at 13,000 g for 15 min at 4 °C. The concentration of protein in each  
393 sample was quantified using BCA assay. Forty - sixty  $\mu$ g of protein from each sample was  
394 denatured in SDS-PAGE sample buffer and resolved on 4-12% Bis-Tris PAGE gels. The separated  
395 proteins were transferred to Polyvinylidene difluoride (PVDF) membrane followed by blocking  
396 with 5% non-fat milk powder (w/v) in Tris-buffered saline (10 mM Tris-HCl, pH 7.5, 100 mM  
397 NaCl, 0.1% Tween-20) for 1 h at room temperature. After blocking, the membranes were probed  
398 with desired primary antibodies overnight at 4 °C followed by appropriate peroxidase-conjugated  
399 secondary antibody for 2 h at room temperature and visualized by the Bio-Rad ChemiDoc Imaging  
400 system. To ensure equal protein loading, each membrane was stripped with Restore Western Blot  
401 stripping buffer (Thermo Scientific) and re-probed with  $\beta$ -actin antibody. Detailed information on  
402 antibodies is in Table S1.

403

#### 404 **4.14. Immunofluorescence staining**

405 Treated cells were fixed with 4% paraformaldehyde for 15 min and permeabilized with 1%  
406 Triton X-100 in PBS for 10 min, followed by blocking with 5% BSA in PBS for 1 h. After  
407 blocking, cells were incubated with PKA-C $\alpha$  antibody overnight at 4 °C and secondary antibody

408 for 1 h at room temperature. Nucleus were stained with Dapi for 15 min. Cells were imaged using  
409 Fluorescence microscopy (Nikon Ti2, Japan).

410

#### 411 **4.15. Flow cytometry**

412 Detection of  $\gamma$ H2A.X and cleaved PARP protein level in cisplatin treated H1299 with/without  
413 (R)-NNAL were performed using Apoptosis, DNA Damage and Cell Proliferation Kit (BD  
414 Pharmingen), following the manufacturer's instructions. Briefly, H1299 cells were plated in 6-  
415 well plates with 10% FBS medium. After attachment, cells were starved with 0.5% FBS medium  
416 overnight and treated with test compounds. Treated cells were harvested, stained with Alexa  
417 Fluor® 647 Mouse Anti-H2AX (pS139) antibody and PE Mouse Anti-Cleaved PARP (Asp214)  
418 Antibody. The signals were assessed with a CytoFlex flow cytometer (Beckman Coulter Life  
419 Sciences).

#### 420 **4.16. Statistical analysis**

421 Two tailed Student's *t* tests were used for data analysis with two groups. One-way analysis of  
422 variance (ANOVA) was used for data analysis with no less than three groups followed by  
423 Dunnett's test for comparison between different groups. A P value  $\leq 0.05$  was considered  
424 statistically significant. All analyses were conducted in GraphPad Prism4 (GraphPad Software,  
425 Inc.)

426

#### 427 **Acknowledgements**

428 The work was partly supported by grants from the National Institute of Health (R01CA193286)  
429 to C. Xing, the Harry T. Mangurian Jr. Foundation to C. Xing, College of Pharmacy Frank  
430 Duckworth Endowment to C. Xing, University of Florida Health Cancer Center Startup fund to C.  
431 Xing, and University of Florida Medicinal Chemistry Mass Spectrometry Support to C. Xing. Y.  
432 Wu was supported by a scholarship from the National Science Foundation of China. The funders  
433 had no role in study design, data collection and interpretation, or the decision to submit the work  
434 for publication. We also acknowledge National Cancer Institute providing PLCO information used  
435 in this manuscript. We would like to thank Sreekanth C. Narayanapillai for the help of mouse  
436 tissue sample collection. We would like to thank Santanu Hati for characterizing NNAL chirality.

437 The costs of publication of this article were defrayed in part by the payment of page charges.  
438 This article must therefore be hereby marked advertisement in accordance with 18 U.S.C. Section  
439 1734 solely to indicate this fact.

440

#### 441 **Conflicts of Interest**

442 No potential conflicts of interest were disclosed.

443

444 **References**

- 445 1 Siegel RL, Miller KD, Jemal A. Cancer statistics, 2018. *CA: a cancer journal for clinicians*  
446 2018; 68: 7-30.
- 447  
448 2 Siegel RL, Miller KD, Jemal A. Cancer Statistics, 2017. *CA: a cancer journal for clinicians*  
449 2017; 67: 7-30.
- 450  
451 3 Siegel RL, Miller KD, Jemal A. Cancer statistics, 2019. *CA Cancer J Clin* 2019; 69: 7-34.  
452
- 453 4 Siegel RL, Jemal A, Wender RC, Gansler T, Ma J, Brawley OW. An assessment of  
454 progress in cancer control. *CA Cancer J Clin* 2018; 68: 329-339.
- 455  
456 5 Zhou W, Heist RS, Liu G, Park S, Neuberg DS, Asomaning K *et al.* Smoking cessation  
457 before diagnosis and survival in early stage non-small cell lung cancer patients. *Lung*  
458 *Cancer* 2006; 53: 375-380.
- 459  
460 6 Bhatt VR, Batra R, Silberstein PT, Loberiza FR, Jr., Ganti AK. Effect of smoking on  
461 survival from non-small cell lung cancer: a retrospective Veterans' Affairs Central Cancer  
462 Registry (VACCR) cohort analysis. *Med Oncol* 2015; 32: 339.
- 463  
464 7 Lee SJ, Lee J, Park YS, Lee C-H, Lee S-M, Yim J-J *et al.* Impact of smoking on mortality  
465 of patients with non-small cell lung cancer. *Thorac Cancer* 2014; 5: 43-49.
- 466  
467 8 Gemine RE, Ghosal R, Collier G, Parry D, Campbell I, Davies G *et al.* Longitudinal study  
468 to assess impact of smoking at diagnosis and quitting on 1-year survival for people with  
469 non-small cell lung cancer. *Lung Cancer* 2019; 129: 1-7.
- 470  
471 9 Baser S, Shannon VR, Eapen GA, Jimenez CA, Onn A, Lin E *et al.* Smoking cessation  
472 after diagnosis of lung cancer is associated with a beneficial effect on performance status.  
473 *Chest* 2006; 130: 1784-1790.
- 474  
475 10 Yang C-C, Liu C-Y, Wang K-Y, Wen F-H, Lee Y-C, Chen M-L. Smoking Status Among  
476 Patients With Newly Diagnosed Lung Cancer in Taiwan. *Journal of Nursing Research*  
477 2019; 27.
- 478  
479 11 Sardari Nia P, Weyler J, Colpaert C, Vermeulen P, Marck EV, Schil PV. Prognostic value  
480 of smoking status in operated non-small cell lung cancer. *Lung Cancer* 2005; 47: 351-359.

- 481  
482 12 Ferketich AK, Niland JC, Mamet R, Zornosa C, D'Amico TA, Ettinger DS *et al.* Smoking  
483 status and survival in the national comprehensive cancer network non-small cell lung  
484 cancer cohort. *Cancer* 2013; 119: 847-853.
- 485  
486 13 PLCO Datasets. <https://cdascancergov/datasets/plco/30/> 2020.
- 487  
488 14 Hecht SS. Biochemistry, biology, and carcinogenicity of tobacco-specific N-nitrosamines.  
489 *Chem Res Toxicol* 1998; 11: 559-603.
- 490  
491 15 Cloutier JF, Drouin R, Weinfeld M, O'Connor TR, Castonguay A. Characterization and  
492 mapping of DNA damage induced by reactive metabolites of 4-(methylnitrosamino)-1-(3-  
493 pyridyl)-1-butanone (NNK) at nucleotide resolution in human genomic DNA. *J Mol Biol*  
494 2001; 313: 539-557.
- 495  
496 16 Yalcin E, de la Monte S. Tobacco nitrosamines as culprits in disease: mechanisms  
497 reviewed. *Journal of physiology and biochemistry* 2016; 72: 107-120.
- 498  
499 17 Shen J, Xu L, Owonikoko TK, Sun S-Y, Khuri FR, Curran WJ *et al.* NNK promotes  
500 migration and invasion of lung cancer cells through activation of c-Src/PKC $\alpha$ /FAK loop.  
501 *Cancer letters* 2012; 318: 106-113.
- 502  
503 18 Jin Z, Gao F, Flagg T, Deng X. Tobacco-specific Nitrosamine 4-(Methylnitrosamino)-1-  
504 (3-pyridyl)-1-butanone Promotes Functional Cooperation of Bcl2 and c-Myc through  
505 Phosphorylation in Regulating Cell Survival and Proliferation. *Journal of Biological*  
506 *Chemistry* 2004; 279: 40209-40219.
- 507  
508 19 Schuller HM, Plummer HK, 3rd, Jull BA. Receptor-mediated effects of nicotine and its  
509 nitrosated derivative NNK on pulmonary neuroendocrine cells. *Anat Rec A Discov Mol*  
510 *Cell Evol Biol* 2003; 270: 51-58.
- 511  
512 20 Schuller HM, Tithof PK, Williams M, Plummer H. The Tobacco-specific Carcinogen 4-  
513 (Methylnitrosamino)-1-(3-pyridyl)-1-butanone Is a  $\beta$ -Adrenergic Agonist and Stimulates  
514 DNA Synthesis in Lung Adenocarcinoma via  $\beta$ -Adrenergic Receptor-mediated Release of  
515 Arachidonic Acid. *Cancer Research* 1999; 59: 4510.
- 516  
517 21 Trushin N, Hecht SS, Carmella SG, Reid-Quinn CA, Southers JL, Gombar CT *et al.*  
518 Metabolism of the tobacco-specific nitrosamine 4-(methylnitrosamino)-1-(3-pyridyl)-1-



- 519 butanone in the patas monkey: pharmacokinetics and characterization of glucuronide  
520 metabolites. *Carcinogenesis* 1993; 14: 229-236.
- 521
- 522 22 Castonguay A, Trushin N, Tjälve H, d'Argy R, Sperber G. Metabolism and tissue  
523 distribution of tobacco-specific N-nitrosamines in the marmoset monkey ( *Callithrix*  
524 *jacchus* ). *Carcinogenesis* 1985; 6: 1543-1550.
- 525
- 526 23 Staretz ME, Hecht SS. Effects of Phenethyl Isothiocyanate on the Tissue Distribution of 4-  
527 (Methylnitrosamino)-1-(3-pyridyl)-1-butanone and Metabolites in F344 Rats. *Cancer*  
528 *Research* 1995; 55: 5580.
- 529
- 530 24 Hoffmann D, LaVoie EJ, Adams JD. On the pharmacokinetics of tobacco-specific N-  
531 nitrosamines in Fischer rats. *Carcinogenesis* 1985; 6: 509-511.
- 532
- 533 25 Church TR, Anderson KE, Caporaso NE, Geisser MS, Le CT, Zhang Y *et al.* A  
534 prospectively measured serum biomarker for a tobacco-specific carcinogen and lung  
535 cancer in smokers. *Cancer Epidemiol Biomarkers Prev* 2009; 18: 260-266.
- 536
- 537 26 Modesto JL, Hull A, Angstadt AY, Berg A, Gallagher CJ, Lazarus P *et al.* NNK reduction  
538 pathway gene polymorphisms and risk of lung cancer. *Mol Carcinog* 2015; 54 Suppl 1:  
539 E94-E102.
- 540
- 541 27 Kozlovich S, Chen G, Lazarus P. Stereospecific Metabolism of the Tobacco-Specific  
542 Nitrosamine, NNAL. *Chem Res Toxicol* 2015; 28: 2112-2119.
- 543
- 544 28 Murphy SE, Park SL, Balbo S, Haiman CA, Hatsukami DK, Patel Y *et al.* Tobacco  
545 biomarkers and genetic/epigenetic analysis to investigate ethnic/racial differences in lung  
546 cancer risk among smokers. *NPJ precision oncology* 2018; 2: 17.
- 547
- 548 29 Stepanov I, Upadhyaya P, Carmella SG, Feuer R, Jensen J, Hatsukami DK *et al.* Extensive  
549 metabolic activation of the tobacco-specific carcinogen 4-(methylnitrosamino)-1-(3-  
550 pyridyl)-1-butanone in smokers. *Cancer Epidemiol Biomarkers Prev* 2008; 17: 1764-1773.
- 551
- 552 30 Richter E, Engl J, Friesenegger S, Tricker AR. Biotransformation of 4-  
553 (methylnitrosamino)-1-(3-pyridyl)-1-butanone in lung tissue from mouse, rat, hamster, and  
554 man. *Chem Res Toxicol* 2009; 22: 1008-1017.
- 555

- 556 31 Xia Y, Bernert JT, Jain RB, Ashley DL, Pirkle JL. Tobacco-specific nitrosamine 4-  
557 (methylnitrosamino)-1-(3-pyridyl)-1-butanol (NNAL) in smokers in the united states:  
558 NHANES 2007–2008. *Biomarkers* 2011; 16: 112-119.
- 559
- 560 32 Carmella SG, Ye M, Upadhyaya P, Hecht SS. Stereochemistry of Metabolites of a  
561 Tobacco-specific Lung Carcinogen in Smokers' Urine. *Cancer Research* 1999; 59: 3602.
- 562
- 563 33 Hecht SS, Carmella SG, Chen M, Koch JFD, Miller AT, Murphy SE *et al.* Quantitation of  
564 Urinary Metabolites of a Tobacco-specific Lung Carcinogen after Smoking Cessation.  
565 *Cancer Research* 1999; 59: 590.
- 566
- 567 34 Upadhyaya P, Kenney PM, Hochalter JB, Wang M, Hecht SS. Tumorigenicity and  
568 metabolism of 4-(methylnitrosamino)-1-(3-pyridyl)-1-butanol enantiomers and  
569 metabolites in the A/J mouse. *Carcinogenesis* 1999; 20: 1577-1582.
- 570
- 571 35 Chen G, Luo S, Kozlovich S, Lazarus P. Association between Glucuronidation Genotypes  
572 and Urinary NNAL Metabolic Phenotypes in Smokers. *Cancer Epidemiol Biomarkers  
573 Prev* 2016; 25: 1175-1184.
- 574
- 575 36 Wang YN, S.C.; Tessier, K.; Strayer, L.; Upadhyaya, P.; Hu, Q.; Kingston, R.; Salloum,  
576 R. G.; Lu, J.; Hecht, S.S.; Hatsukami, D.; Fujioka, N.; Xing, C. The Impact of One-week  
577 Dietary Supplementation with Kava on Biomarkers of Tobacco Use and Nitrosamine-  
578 based Carcinogenesis Risk among Active Smokers. *Cancer Prev Res* 2020; 33: 1980-1988.
- 579
- 580 37 Wang Y, Narayanapillai SC, Hu Q, Fujioka N, Xing C. Detection and quantification of 4-  
581 hydroxy-1-(3-pyridyl)-1-butanone (HPB) from smoker albumin and its potential as a  
582 surrogate biomarker of tobacco-specific nitrosamines exposure and bioactivation.  
583 *Toxicology letters* 2019; 311: 11-16.
- 584
- 585 38 Wang Y, Narayanapillai S, Hu Q, Fujioka N, Xing C. Contribution of Tobacco Use and 4-  
586 (Methylnitrosamino)-1-(3-pyridyl)-1-butanone to Three Methyl DNA Adducts in Urine.  
587 *Chemical research in toxicology* 2018; 31: 836-838.
- 588
- 589 39 Carmella SG, Han S, Villalta PW, Hecht SS. Analysis of total 4-(methylnitrosamino)-1-  
590 (3-pyridyl)-1-butanol in smokers' blood. *Cancer Epidemiol Biomarkers Prev* 2005; 14:  
591 2669-2672.
- 592
- 593 40 Carmella SG, Yoder A, Hecht SS. Combined analysis of r-1,t-2,3,c-4-tetrahydroxy-1,2,3,4-  
594 tetrahydrophenanthrene and 4-(methylnitrosamino)-1-(3-pyridyl)-1-butanol in smokers'

- 595 plasma. *Cancer epidemiology, biomarkers & prevention : a publication of the American*  
596 *Association for Cancer Research, cosponsored by the American Society of Preventive*  
597 *Oncology* 2006; 15: 1490-1494.
- 598  
599 41 Sanchez-Cespedes M. A role for LKB1 gene in human cancer beyond the Peutz-Jeghers  
600 syndrome. *Oncogene* 2007; 26: 7825-7832.
- 601  
602 42 Gill RK, Yang SH, Meerzaman D, Mechanic LE, Bowman ED, Jeon HS *et al.* Frequent  
603 homozygous deletion of the LKB1/STK11 gene in non-small cell lung cancer. *Oncogene*  
604 2011; 30: 3784-3791.
- 605  
606 43 Matsumoto S, Iwakawa R, Takahashi K, Kohno T, Nakanishi Y, Matsuno Y *et al.*  
607 Prevalence and specificity of LKB1 genetic alterations in lung cancers. *Oncogene* 2007;  
608 26: 5911-5918.
- 609  
610 44 Amin RM, Hiroshima K, Iyoda A, Hoshi K, Honma K, Kuroki M *et al.* LKB1 protein  
611 expression in neuroendocrine tumors of the lung. *Pathol Int* 2008; 58: 84-88.
- 612  
613 45 Ghaffar H, Sahin F, Sanchez-Cepedes M, Su GH, Zahurak M, Sidransky D *et al.* LKB1  
614 protein expression in the evolution of glandular neoplasia of the lung. *Clin Cancer Res*  
615 2003; 9: 2998-3003.
- 616  
617 46 Ji H, Ramsey MR, Hayes DN, Fan C, McNamara K, Kozlowski P *et al.* LKB1 modulates  
618 lung cancer differentiation and metastasis. *Nature* 2007; 448: 807-810.
- 619  
620 47 Xu C, Fillmore CM, Koyama S, Wu H, Zhao Y, Chen Z *et al.* Loss of Lkb1 and Pten leads  
621 to lung squamous cell carcinoma with elevated PD-L1 expression. *Cancer Cell* 2014; 25:  
622 590-604.
- 623  
624 48 Mukhopadhyay A, Berrett KC, Kc U, Clair PM, Pop SM, Carr SR *et al.* Sox2 cooperates  
625 with Lkb1 loss in a mouse model of squamous cell lung cancer. *Cell Rep* 2014; 8: 40-49.
- 626  
627 49 Collins SP, Reoma JL, Gamm DM, Uhler MD. LKB1, a novel serine/threonine protein  
628 kinase and potential tumour suppressor, is phosphorylated by cAMP-dependent protein  
629 kinase (PKA) and prenylated in vivo. *Biochem J* 2000; 345 Pt 3: 673-680.
- 630

- 631 50 Wei B, Blount BC, Xia B, Wang L. Assessing exposure to tobacco-specific carcinogen  
632 NNK using its urinary metabolite NNAL measured in US population: 2011-2012. *J Expo*  
633 *Sci Environ Epidemiol* 2016; 26: 249-256.
- 634
- 635 51 Rioux N, Castonguay A. Prevention of NNK-induced lung tumorigenesis in A/J mice by  
636 acetylsalicylic acid and NS-398. *Cancer Res* 1998; 58: 5354-5360.
- 637
- 638 52 Rioux N, Castonguay A. Recovery from 4-(methylnitrosamino)-1-(3-pyridyl)-1-butanone-  
639 induced immunosuppression in A/J mice by treatment with nonsteroidal anti-inflammatory  
640 drugs. *J Natl Cancer Inst* 1997; 89: 874-880.
- 641
- 642 53 Duperron C, Castonguay A. Chemopreventive efficacies of aspirin and sulindac against  
643 lung tumorigenesis in A/J mice. *Carcinogenesis* 1997; 18: 1001-1006.
- 644
- 645 54 Ellis PM, Vandermeer R. Delays in the diagnosis of lung cancer. *Journal of thoracic*  
646 *disease* 2011; 3: 183-188.
- 647
- 648 55 Riihimaki M, Hemminki A, Fallah M, Thomsen H, Sundquist K, Sundquist J *et al.*  
649 Metastatic sites and survival in lung cancer. *Lung cancer* 2014; 86: 78-84.
- 650
- 651 56 Sosa Iglesias V, Giuranno L, Dubois LJ, Theys J, Vooijs M. Drug Resistance in Non-Small  
652 Cell Lung Cancer: A Potential for NOTCH Targeting? *Frontiers in oncology* 2018; 8: 267.
- 653
- 654 57 Huang RY, Li MY, Hsin MK, Underwood MJ, Ma LT, Mok TS *et al.* 4-  
655 Methylnitrosamino-1-3-pyridyl-1-butanone (NNK) promotes lung cancer cell survival by  
656 stimulating thromboxane A2 and its receptor. *Oncogene* 2011; 30: 106-116.
- 657
- 658 58 Boo H-J, Min H-Y, Jang H-J, Yun HJ, Smith JK, Jin Q *et al.* The tobacco-specific  
659 carcinogen-operated calcium channel promotes lung tumorigenesis via IGF2 exocytosis in  
660 lung epithelial cells. *Nature communications* 2016; 7: 12961-12961.
- 661
- 662 59 Schuller HM. Mechanisms of smoking-related lung and pancreatic adenocarcinoma  
663 development. *Nature Reviews Cancer* (Review Article) 2002; 2: 455.
- 664
- 665 60 Gurumurthy S, Hezel AF, Sahin E, Berger JH, Bosenberg MW, Bardeesy N. LKB1  
666 deficiency sensitizes mice to carcinogen-induced tumorigenesis. *Cancer Res* 2008; 68: 55-  
667 63.

668

- 669 61 Mitchell KG, Parra ER, Zhang J, Nelson DB, Corsini EM, Villalobos P *et al.* LKB1/STK11  
670 Expression in Lung Adenocarcinoma and Associations with Patterns of Recurrence. *Ann*  
671 *Thorac Surg* 2020.
- 672  
673 62 Borzi C, Galli G, Ganzinelli M, Signorelli D, Vernieri C, Garassino MC *et al.* Beyond  
674 LKB1 Mutations in Non-Small Cell Lung Cancer: Defining LKB1less Phenotype to  
675 Optimize Patient Selection and Treatment. *Pharmaceuticals (Basel)* 2020; 13.
- 676  
677 63 Zhang J, Deng YT, Liu J, Wang YQ, Yi TW, Huang BY *et al.* Norepinephrine induced  
678 epithelial-mesenchymal transition in HT-29 and A549 cells in vitro. *J Cancer Res Clin*  
679 *Oncol* 2016; 142: 423-435.
- 680  
681 64 Carlisle DL, Liu X, Hopkins TM, Swick MC, Dhir R, Siegfried JM. Nicotine activates cell-  
682 signaling pathways through muscle-type and neuronal nicotinic acetylcholine receptors in  
683 non-small cell lung cancer cells. *Pulm Pharmacol Ther* 2007; 20: 629-641.
- 684  
685 65 Srinivasan S, Totiger T, Shi C, Castellanos J, Lamichhane P, Dosch AR *et al.* Tobacco  
686 Carcinogen-Induced Production of GM-CSF Activates CREB to Promote Pancreatic  
687 Cancer. *Cancer Res* 2018; 78: 6146-6158.
- 688  
689 66 Al-Wadei HA, Schuller HM. beta-Carotene promotes the development of NNK-induced  
690 small airway-derived lung adenocarcinoma. *Eur J Cancer* 2009; 45: 1257-1264.
- 691  
692 67 Meaney CL, Mitchell KA, Zingone A, Brown D, Bowman E, Yu Y *et al.* Circulating  
693 Inflammation Proteins Associated With Lung Cancer in African Americans. *J Thorac*  
694 *Oncol* 2019; 14: 1192-1203.
- 695  
696 68 Erickson P, Gardner LD, Loffredo CA, St George DM, Bowman ED, Deepak J *et al.* Racial  
697 and Ethnic Differences in the Relationship between Aspirin Use and Non-Small Cell Lung  
698 Cancer Risk and Survival. *Cancer Epidemiol Biomarkers Prev* 2018; 27: 1518-1526.
- 699  
700 69 Jalas JR, Hecht SS. Synthesis of stereospecifically deuterated 4-(methylnitrosamino)-1-(3-  
701 pyridyl)-1-butanol (NNAL) iastereomers and metabolism by A/J mouse lung microsomes  
702 and cytochrome p450 2A5. *Chemical research in toxicology* 2003; 16: 782-793.
- 703  
704 70 Narayanapillai SC, von Weymarn LB, Carmella SG, Leitzman P, Paladino J, Upadhyaya  
705 P *et al.* Dietary Dihydromethysticin Increases Glucuronidation of 4-(Methylnitrosamino)-  
706 1-(3-Pyridyl)-1-Butanol in A/J Mice, Potentially Enhancing Its Detoxification. *Drug*  
707 *metabolism and disposition: the biological fate of chemicals* 2016; 44: 422-427.

- 708  
709 71 Jin L, Chun J, Pan C, Kumar A, Zhang G, Ha Y *et al.* The PLAG1-GDH1 Axis Promotes  
710 Anoikis Resistance and Tumor Metastasis through CamKK2-AMPK Signaling in LKB1-  
711 Deficient Lung Cancer. *Mol Cell* 2018; 69: 87-99 e87.
- 712  
713 72 Jin L, Chun J, Pan C, Li D, Lin R, Alesi GN *et al.* MAST1 Drives Cisplatin Resistance in  
714 Human Cancers by Rewiring cRaf-Independent MEK Activation. *Cancer Cell* 2018; 34:  
715 315-330 e317.
- 716  
717 73 Narayanapillai SC, Balbo S, Leitzman P, Grill AE, Upadhyaya P, Shaik AA *et al.*  
718 Dihydromethysticin from kava blocks tobacco carcinogen 4-(methylnitrosamino)-1-(3-  
719 pyridyl)-1-butanone-induced lung tumorigenesis and differentially reduces DNA damage  
720 in A/J mice. *Carcinogenesis* 2014; 35: 2365-2372.
- 721  
722 74 Balbo S, Johnson CS, Kovi RC, James-Yi SA, O'Sullivan MG, Wang M *et al.*  
723 Carcinogenicity and DNA adduct formation of 4-(methylnitrosamino)-1-(3-pyridyl)-1-  
724 butanone and enantiomers of its metabolite 4-(methylnitrosamino)-1-(3-pyridyl)-1-butanol  
725 in F-344 rats. *Carcinogenesis* 2014; 35: 2798-2806.
- 726  
727 75 Puppala M, Narayanapillai SC, Leitzman P, Sun H, Upadhyaya P, O'Sullivan MG *et al.*  
728 Pilot in Vivo Structure-Activity Relationship of Dihydromethysticin in Blocking 4-  
729 (Methylnitrosamino)-1-(3-pyridyl)-1-butanone-Induced O(6)-Methylguanine and Lung  
730 Tumor in A/J Mice. *Journal of medicinal chemistry* 2017; 60: 7935-7940.
- 731  
732  
733

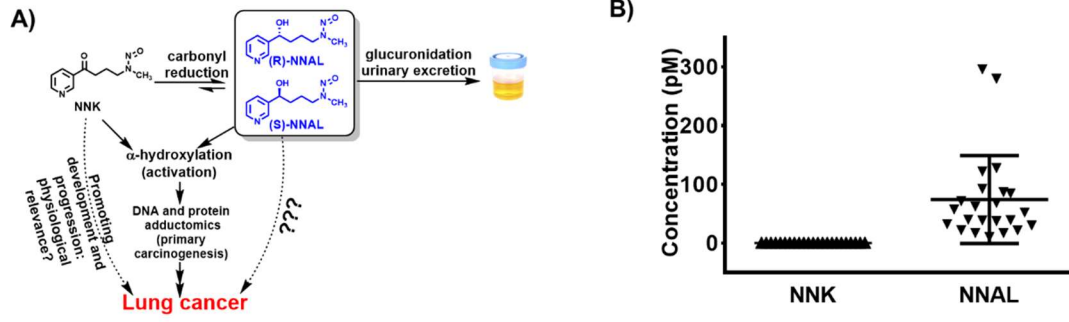

734

735 **Figure 1. A.** Simplified major pathways of NNK metabolism, carcinogenesis, and potential effects  
736 of NNK and NNAL on transformed lung cancer cells. **B.** Concentrations of NNK and NNAL in  
737 the plasma samples from human smokers.

738



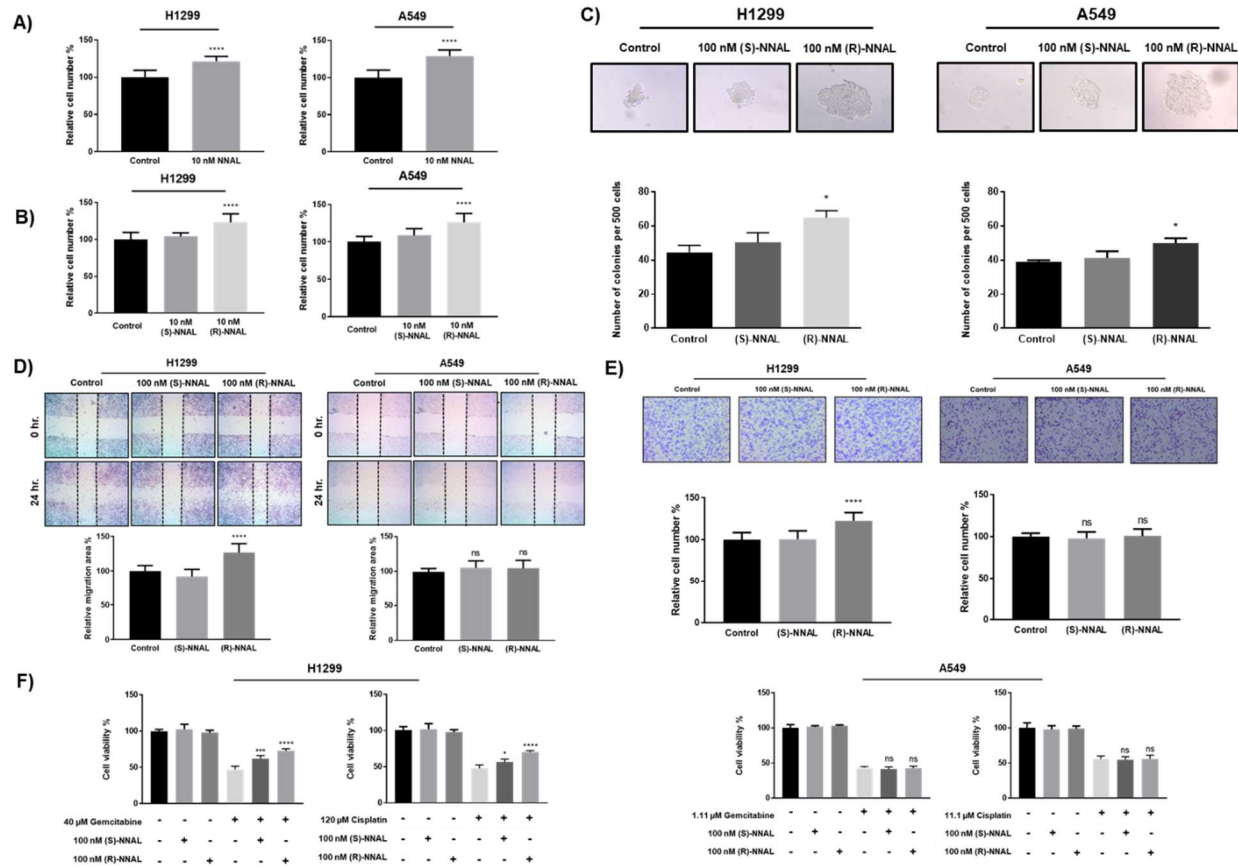

739

740 **Figure 2.** Effect of NNAL enantiomers on malignant phenotypes in H1299 and A549 lung cancer

741 cells.

742 **A.** Effect of NNAL (10 nM) on cell proliferation. **B.** Effect of NNAL enantiomer (10 nM) on cell

743 proliferation. **C.** Effect of NNAL enantiomers (100 nM) on colony formation. **D.** Effect of NNAL

744 enantiomers (100 nM) on cell migration via wound healing assay. **E.** Effect of NNAL enantiomers

745 (100 nM) on cell migration via transwell assay. **F.** Effect of NNAL enantiomers (100 nM) on

746 conferring drug resistance to gemcitabine (40 μM) or cisplatin (120 μM) treatment. \*, P<0.05; \*\*,

747 P<0.01; \*\*\*, P<0.001.

748



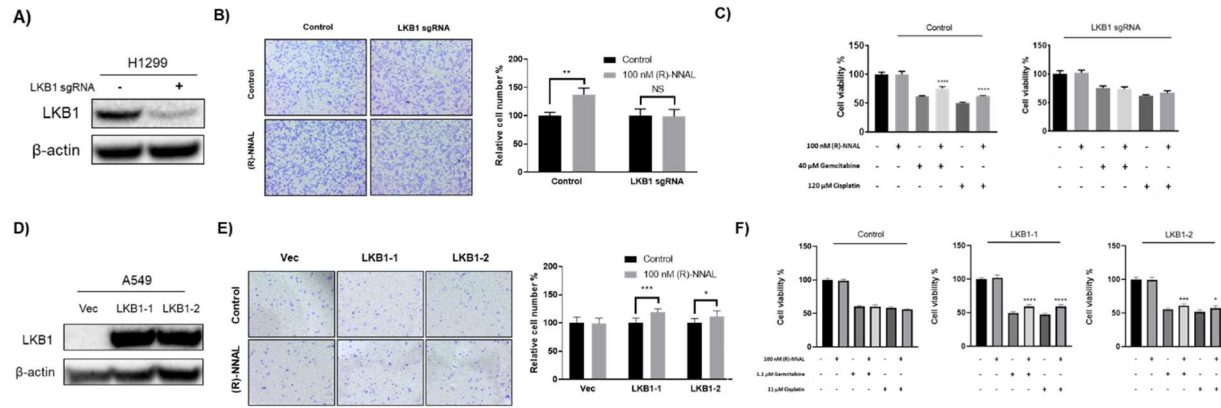

749

750 **Figure 3.** The function of LKB1 on malignant phenotypes promoted by NNAL exposure.

751 **A.** Expression of LKB1 in H1299 LKB1 knockout cells. **B.** Effect of (R)-NNAL on cell migration  
 752 in H1299 LKB1 knockout cells. **C.** Effect of (R)-NNAL on the cytotoxicity of gemcitabine and  
 753 cisplatin in H1299 LKB1 knockout cells. **D.** Expression of LKB1 in A549 LKB1-knockin cells.  
 754 **E.** Effect of (R)-NNAL on cell migration in A549 LKB1-knockin cells. **F.** Effect of (R)-NNAL on  
 755 the cytotoxicity of gemcitabine and cisplatin in A549 LKB1-knockin cells. \*, P<0.05; \*\*, P<0.01;  
 756 \*\*\*, P<0.001.

757

758

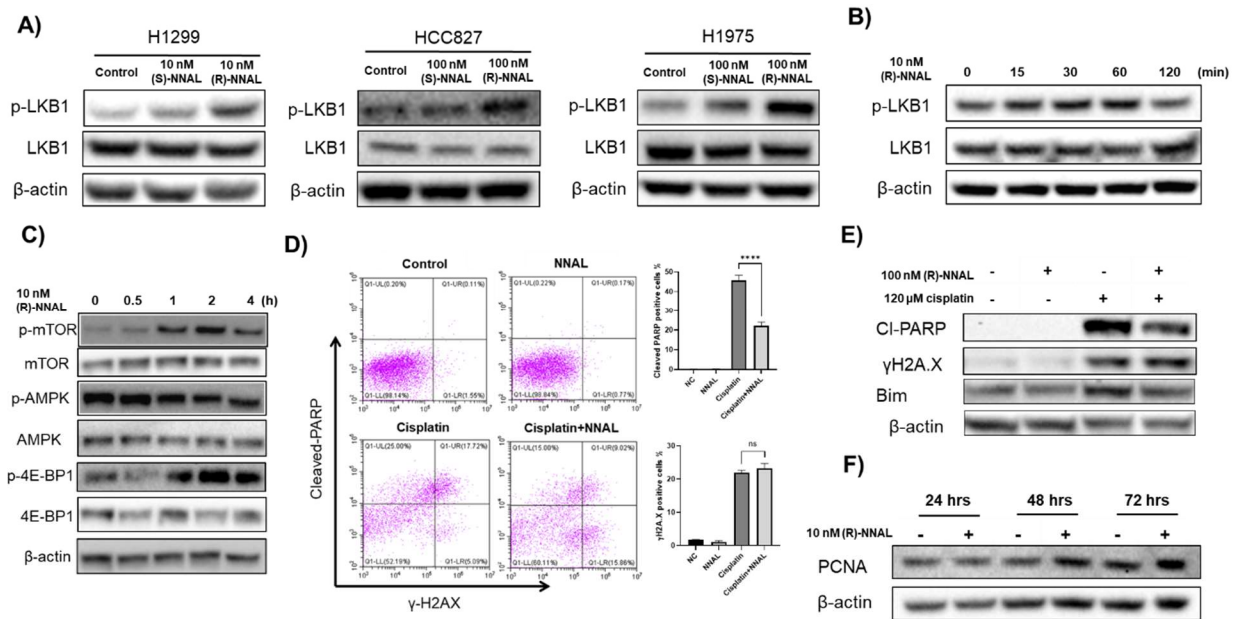

759

760 **Figure 4.** Effects of NNAL on LKB1 phosphorylation and associated signaling in *LKB1* WT lung  
761 cancer cells.

762 **A.** The effects of (R)- and (S)-NNAL on LKB1 deactivating phosphorylation at Ser428. Cells were  
763 treated with 10 nM NNAL for 30 min. **B.** Time course effect of (R)-NNAL on the phosphorylation  
764 of LKB1 at Ser428 (H1299). **C.** Time course effect of (R)-NNAL on AMPK, mTOR and 4EBP1  
765 phosphorylation in H1299. **D.** and **E.** Effect of (R)-NNAL on cisplatin induced DNA damage and  
766 PARP cleavage. **F.** Time course effect of (R)-NNAL exposure on PCNA levels in H1299.

767

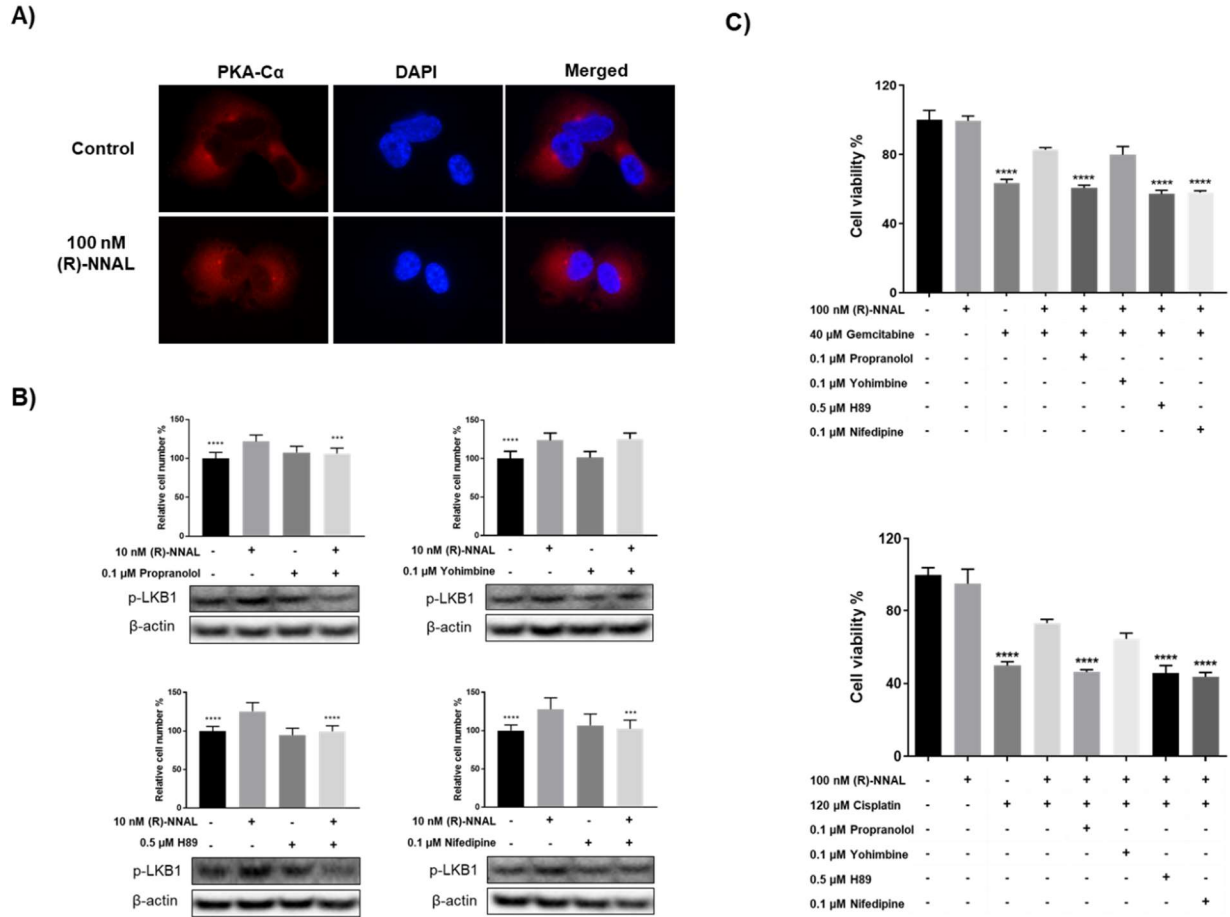

768

769 **Figure 5.** The potential upstream signaling events governing NNAL-promoted phenotypes with  
 770 pharmacological inhibitors.

771 **A.** Effect of (R)-NNAL on PKA-C $\alpha$  nucleus translocation in H1299. Cells were treated with 100  
 772 nM (R)-NNAL for 60 min. DAPI was used to stain the nucleus. **B.** Effect of inhibition of  $\beta$ -ARs  
 773 (propranolol), Ca<sup>2+</sup> channels (nifedipine), PKA (H89) and  $\alpha$ -ARs (yohimbine) on NNAL-  
 774 promoted cell proliferation and LKB1 phosphorylation (Ser428). H1299 cells were co-treated with  
 775 10 nM (R)-NNAL and 0.1  $\mu$ M nifedipine, 0.1  $\mu$ M propranolol, 2.5  $\mu$ M bupropion, 0.5  $\mu$ M H89 or  
 776 0.1  $\mu$ M yohimbine for 6 days. **C.** Effect of inhibition of  $\beta$ -ARs (propranolol), Ca<sup>2+</sup> channels

777 (nifedipine), PKA (H89) an  $\alpha$ -ARs (yohimbine) on NNAL-promoted resistance to gemcitabine and  
778 cisplatin. H1299 cells were co-treated with 40  $\mu$ M gemcitabine or 120  $\mu$ M cisplatin along  
779 inhibitors. \*, P<0.05; \*\*, P<0.01; \*\*\*, P<0.001.

780

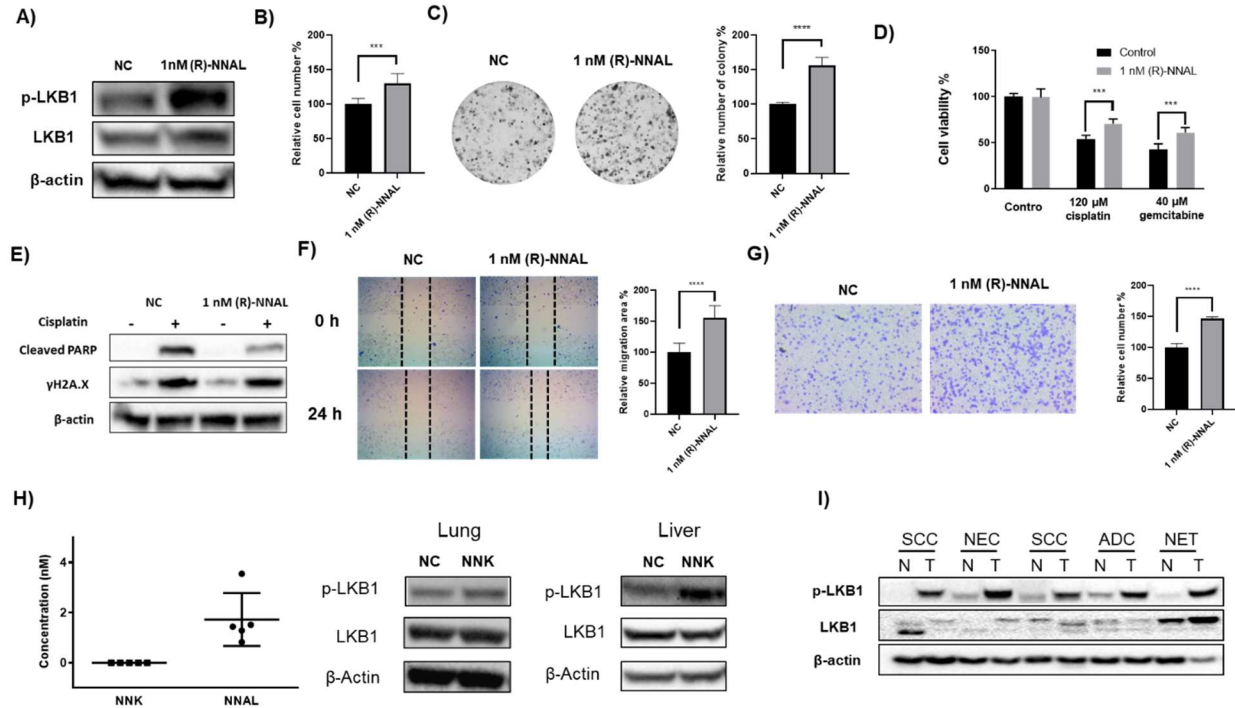

781

782 **Figure 6.** LKB1 phosphorylation status *in vitro*, *in vivo* and in clinical samples with potential  
 783 chronic NNAL exposure.

784 Effect of 60-day (R)-NNAL exposure on cell proliferation (A), colony formation (B), sensitivity  
 785 to gemcitabine and cisplatin treatment (C), cell migration (D and E), and LKB1 phosphorylation  
 786 (F) in H1299 cells. H1299 cells was treated with (R)-NNAL (1 nM) for 60 days and no additional  
 787 (R)-NNAL was added when running these assay. G. Concentrations of NNK and NNAL in mouse  
 788 serum (n = 5) and LKB1 status in the lung and liver tissues of A/J mice upon 4-week NNK  
 789 exposure. A/J mice were given NNK in drinking water (40 ppm) for 4 weeks. H. Status of LKB1  
 790 in normal (N) or tumor (T) tissues of five lung cancer patients (SCC: squamous cell carcinoma;  
 791 ADC: adenocarcinoma; NEC: neuroendocrine carcinoma; NET: neuroendocrine carcinoid).

792

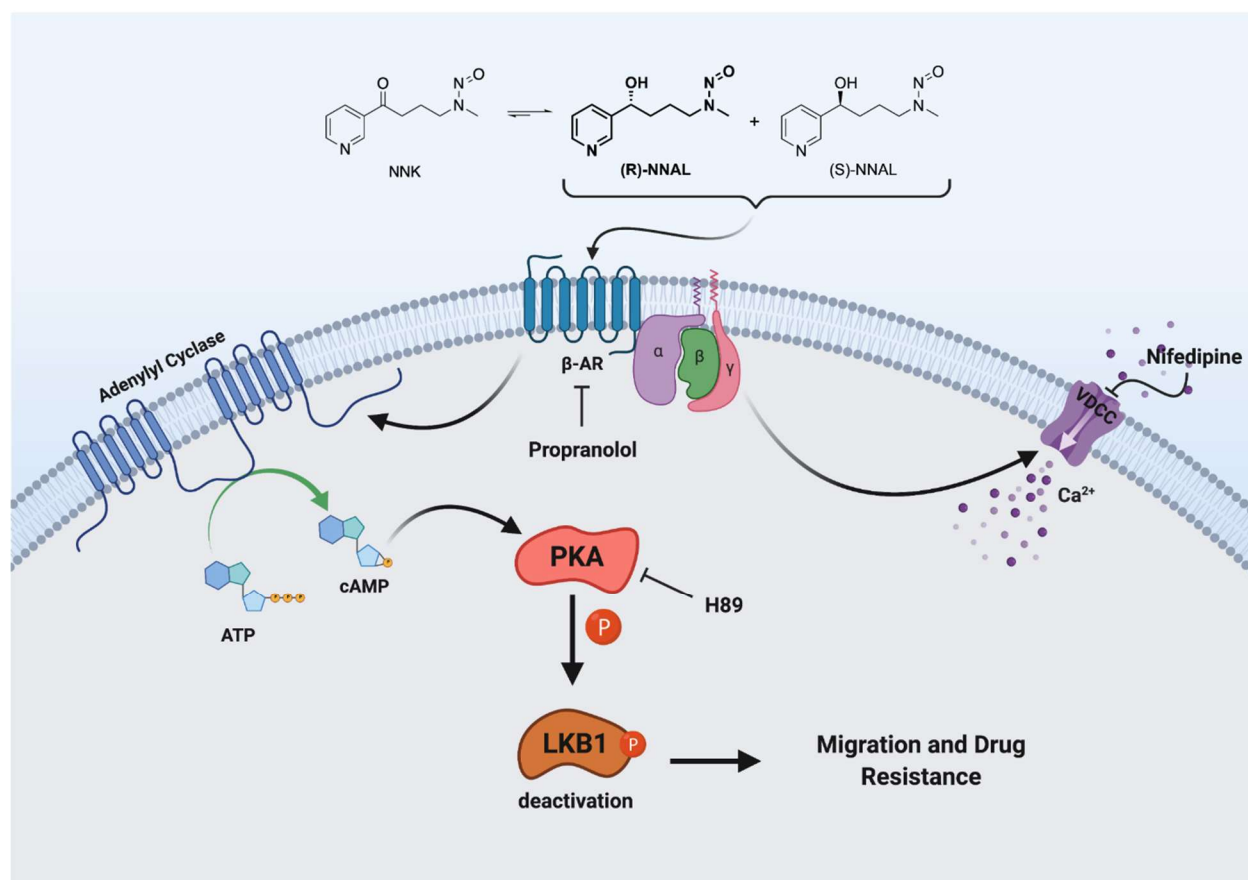

793

794 **Figure 7.** Proposed mechanisms of NNAL in promoting progression of lung cancer cells with wild  
795 type LKB1.

796 **Table 1.** Smoking status among NSCLC patients.

| <b>Number of Patients</b> | <b>Non-smokers</b> | <b>Former smokers</b> | <b>Continue smoking after diagnosis</b> | <b>Quit smoking after diagnosis</b> | <b>No information</b> | <b>Reference</b> |
|---------------------------|--------------------|-----------------------|-----------------------------------------|-------------------------------------|-----------------------|------------------|
| 1124                      | 64 (5.7%)          | 696 (61.9%)           | 293 (26.1%)                             | 71 (6.3%)                           |                       | [8]              |
| 206                       | 15 (7.3%)          | 98 (47.6%)            | 47 (22.8%)                              | 46 (22.3%)                          |                       | [9]              |
| 388                       | 191 (49.2%)        | 79 (20.4%)            | 82 (21.1%)                              | 36 (9.3%)                           |                       | [10]             |
| 311                       | 25 (8.0%)          | 82 (26.4%)            | 169 (54.3%)                             | 35 (11.3%)                          |                       | [11]             |
| 313                       | 92 (29.4%)         | 125 (39.9%)           | 96 (30.7%)                              |                                     |                       | [7]              |
| 4200                      | 618 (14.7%)        | 2099 (50.0%)          | 1483 (35.3%)                            |                                     |                       | [12]             |
| 3212                      | 266 (8.3%)         | 1603 (49.9%)          | 1232 (38.4%)                            |                                     | 111 (3.4%)            | [13]             |

797
